# Supplementary material for: Sprachstand vierjähriger monolingual deutscher Kinder
Source: Atypon-hosted journal article supplement (doi:10.1026/0942-5403/a000363), 2022-01-01
Supplement: 0942-5403_a000363_esm1.pdf [file 0942-5403_a000363_esm1.pdf]

## **ESM 1: Beschreibung von KiSS.2 und der Studiendurchführung, einschl. Tabelle E1**

Die Güteindizes von KiSS.2 wurden in mehreren aufwendigen Validierungsstudien geprüft und vom Mercator-Institut für Sprachförderung und Deutsch als Zweitsprache größtenteils als gut bis sehr gut eingestuft (Neugebauer & Becker-Mrotzek, 2013). Für sprachpädagogisch Förderbedürftige liegt die Sensitivität von KiSS.2 bei 98%, die Spezifität bei 79%. Für klinisch Abklärungsbedürftige (ohne Berücksichtigung von Redefluss- und Stimmstörungen) beträgt die Sensitivität 67% und Spezifität 89%. Für Gesamtauffällige liegt die Sensitivität bei 98% und die Spezifität bei 78% (Neumann & Euler, 2010).

Anhand eines Wimmelbildes müssen Kinder in KiSS.2 einige Gegenstände auf dem Bild zeigen, Fragen wie „Was ist das?“ bzw. „Welche Form hat x?“ beantworten bzw. selber Fragen an die Tester\_innen stellen sowie Kunstwörter und Sätze nachsprechen. Antworten der Kinder werden in einem Testbogen dokumentiert. Die Testdurchführung erfolgt standardisiert, indem alle Fragen in der Testbatterie ohne Änderungen vorgelesen werden und alle falschen und fragwürdigen Antworten der Kinder komplett aufgeschrieben werden. Nachfragen sind nur unter bestimmten Bedingungen erlaubt, etwa wenn das Kind abgelenkt war bzw. die Frage akustisch nicht verstanden. Test-Items sind mit einem bis drei Punkten unterschiedlich gewichtet. Die minimale Punktzahl in KiSS.2-Untertests liegt jeweils bei 0, die maximale kann Tab. E1 weiter unten entnommen werden.

Die Auswertung von KiSS.2 wurde algorithmisch anhand von Cut-off-Kriterien (s. Tab. E1 unten) für einzelne KiSS.2-Untertests und KiSS.2-Gesamtscore vorgenommen und bei wesentlichen Diskrepanzen bzw. fehlenden Werten manuell korrigiert bzw. ergänzt.

KiSS.2 wurde ursprünglich für die Altersgruppe 4;0-4;5 Jahre normiert. Vorläufige Normwerte für die Altersgruppe 4;6-4;11 Jahre wurden vom Erstautor auf dieselbe Weise wie die Normwerte für die Altersgruppe 4;0-4;5 Jahre berechnet (vgl. Neumann et al., 2010).

KiSS.2 wurde so konzipiert, dass Kinder mit der Sprachtest-Punktzahl unterhalb einer Standardabweichung vom Mittelwert der Normierungsstichprobe als sprachpädagogisch förderbedürftig klassifiziert werden (Neumann & Euler, 2013). Dies entspricht in etwa 16% der Normierungsstichprobe. Daher wurden, unter Berücksichtigung von zusätzlichen 3-4% für falsch positive Ergebnisse, Auffälligkeitsraten von ungefähr 20% aller Kinder (ohne Migrationshintergrund) erwartet. Beim klinischen Abklärungsbedarf wurden prävalenzbedingt Auffälligkeitsraten von ca. 10% erwartet, mit einer starken Überlappung mit dem sprachpädagogischen Förderbedarf. Beide Auffälligkeitsraten (sprachpädagogischer Förderbedarf und klinischer Abklärungsbedarf) sollten in einer Gesamtauffälligkeitsrate von knapp über 20% resultieren.

KiSS-basierte Kita- und Elternfragebögen enthalten diverse soziodemographische Angaben wie Geschlecht und Geburtsdatum, aber auch zahlreiche Variablen, die direkt oder indirekt den Sprachstand des Kindes im Deutschen sowie die Qualität und Quantität des Deutschinputs abfragen. Für die aktuelle Studie wurden beide Fragebögen um einige explorative Items erweitert, die aber in den meisten Fällen bereits in den Validierungsstudien der Jahre 2007-2011 statistisch geprüft wurden und nur zwecks zeitökonomischer Durchführung nicht in die endgültige Version aufgenommen wurden. Die meisten Fragen lassen sich in dichotomer oder Likert-skaliertes Form beantworten. Die für diese Studie herangezogenen Fragebogen-Items können in folgende Kategorien eingeteilt werden: 1) subjektiv eingeschätzter Sprachstand (u. a. subjektive Einschätzung des kindlichen Sprachstands durch Erzieher\_innen mit Schulnoten: 1-3 = unauffällig, 4-6 = auffällig, 2) Sprachförderung, 3) Sprachtherapie, 4) sprachbezogene medizinische Auffälligkeiten, 6) familiäre Veranlagung für Sprachstörungen (Übersicht: s. Tabelle 3 im Haupttext).

Tabelle E 1. KiSS.2-Normwerte: Kind auffällig, wenn mindestens eines der Kriterien nicht erreicht

|                                                                                 | 4;0-4;5 Jahre (Neumann & Euler, 2010) |                             | 4;6-4;11 Jahre (eigene Berechnungen) |                             | Max. Punktzahl |
|---------------------------------------------------------------------------------|---------------------------------------|-----------------------------|--------------------------------------|-----------------------------|----------------|
|                                                                                 | Sprachpädagogischer Förderbedarf      | Klinischer Abklärungsbedarf | Sprachpädagogischer Förderbedarf     | Klinischer Abklärungsbedarf |                |
| <b>Punktzahlen</b>                                                              |                                       |                             |                                      |                             |                |
| KiSS.2-Gesamtscore                                                              | 50                                    | –                           | 57                                   | –                           | 105            |
| Sprachverständnis                                                               | 3                                     | 2                           | 5                                    | 3                           | 8              |
| Wortschatz                                                                      | 9                                     | 8                           | 12                                   | 9                           | 23             |
| Aussprache                                                                      | 7                                     | 7                           | 11                                   | 8                           | 15             |
| Grammatik                                                                       | 10                                    | 7                           | 12                                   | 7                           | 30             |
| Nachsprechen von Kunstwörtern                                                   | –                                     | 3                           | –                                    | 3                           | 12             |
| Nachsprechen von Sätzen                                                         | –                                     | 2                           | –                                    | 3                           | 15             |
| Spontansprache bzw. Sprachproduktion                                            | 1                                     | –                           | 1                                    | –                           | 2              |
| <b>Dichotome Auswertungskriterien</b>                                           |                                       |                             |                                      |                             |                |
| Aussprache des Lauts /k/ bei mind. 1 der 3 Testwörter korrekt                   | –                                     | x                           | –                                    | x                           | –              |
| Aussprache des Lauts /r/ bei mind. 1 der 3 Testwörter korrekt                   | –                                     | x                           | –                                    | x                           | –              |
| Redeflussstörung gemäß Sprachtest oder Eltern- oder Kitabogen (2 von 3 Quellen) | –                                     | x                           | –                                    | x                           | –              |
| Stimmstörung gemäß Sprachtest oder Eltern- oder Kitabogen (2 von 3 Quellen)     | –                                     | x                           | –                                    | x                           | –              |

## **Studiendurchführung**

Da die Testungen fast ausschließlich in Kitas stattfanden, mussten vor der Rekrutierung der Stichprobe (vierjähriger Kinder) mehrere Kitas rekrutiert werden. Um eine repräsentative Stichprobe zu erreichen, wurde darauf geachtet, dass unter den rekrutierten Kitas möglichst viele Regionen, darunter Groß-, Mittel-, Kleinstädte und ländliche Gebiete vertreten waren. Lediglich auf die Rekrutierung der Einrichtungen, die mit öffentlichen Verkehrsmitteln nicht erreichbar waren, wurde meist verzichtet. Aus den Studienzentralen in Marburg und Frankfurt/Main konnten Kitas in Hessen und (selten) Nordrhein-Westfalen erreicht werden; in anderen Bundesländern wurde nicht getestet.

Die Rekrutierung der Kinder erfolgte über die Kitas, die sich bereit erklärt hatten, an der Studie teilzunehmen. Aus Datenschutzgründen wurden direkte Kontakte zu Familien vermieden, stattdessen erfolgte die Kommunikation über die zuständigen Mitarbeiter\_innen bzw. die Leitung der jeweiligen Kita. Diese verteilten Studieninformationen an die Eltern, sammelten unterschriebene Einverständniserklärungen der Eltern ein und organisierten Sprachtesttermine.

Die Monolingualität der Kinder wurde anhand von Fragebögen für Eltern und Kita-Erzieher\_innen geprüft. Kinder, die laut beiden Fragebögen monolingual deutsch aufwuchsen („nur Deutsch“ zuhause sprachen), wurden in diese Studie inkludiert. Der ethnische Hintergrund der Eltern spielte dabei keine Rolle.

Fast alle Testungen fanden in Kitas statt. Dafür wurde ein ruhiger Raum zur Verfügung gestellt. Kinder wurden einzeln getestet, wobei aber die meisten Einrichtungen darauf bestanden, dass Testungen in Anwesenheit eines/r Kita-Mitarbeiters/\_in stattfinden. Die Testdauer betrug in der Regel ca. 15 Minuten. Vereinzelt mussten Testungen auf zwei Termine aufgeteilt werden. Der Zeitpunkt der Testung wurde durch die jeweilige Kita festgelegt, dabei wurde im Sommer etwas seltener getestet als zu anderen Jahreszeiten und nachmittags viel seltener als vormittags.

Eltern- und Kitafragebögen wurden ungefähr zum Zeitpunkt der Testung ausgefüllt und an das Studienteam idealerweise am letzten Testtermin in der jeweiligen Einrichtung abgegeben. Die jeweiligen Testergebnisse wurden den Eltern im sog. Elternbrief mitgeteilt. Bei einem auffälligen Ergebnis wurde den Eltern empfohlen, ihr Kind entweder sprachlich fördern zu lassen (was in der Regel direkt in der jeweiligen Kita möglich war) und/oder es einem Pädiater vorzustellen. Es konnte allerdings aufgrund von Datenschutzbestimmungen nicht ermittelt werden, ob die Eltern diesen Empfehlungen folgten.

Als Sprachtester\_innen wurden meist Doktorand\_innen und Praktikant\_innen (Linguistik- und Medizinstudent\_innen) rekrutiert. Aber auch einige wissenschaftliche Mitarbeiter\_innen, angehende Logopäd\_innen und Professor\_innen führten Sprachtestungen durch.

Um die maximale Vergleichbarkeit der Stichproben aus den Jahren 2009-2012 und 2017-2019 zu gewährleisten, wurden Kinder mit derselben Testbatterie in denselben Bundesländern unter denselben Bedingungen (Belohnung für die Studienteilnahme mit einem Spielzeug etc.) getestet. Derselbe wissenschaftliche Mitarbeiter war in beiden Testphasen für die Einweisung der Sprachtester\_innen und für die Kontrolle der Testergebnisse verantwortlich. Die Kontrolle erfolgte anhand von Audioaufnahmen und ausgefüllten Testbögen, in denen die Antworten der Kinder dokumentiert waren.

Die Testbatterien wurden in eine digitale Datenbank übertragen, die eingegebenen Daten wurden danach mind. zwei Mal mit den Testbatterien abgeglichen. Alle Berechnungen wurden im Programm „IBM SPSS Statistics 24“ durchgeführt (International Business Machines Corp., Armonk, New York, USA). Die Fallzahlen variierten je nachdem, wie viele Erzieher\_innen bzw. Eltern entsprechende Fragen in Fragebögen beantworteten. Laut Kolmogorov-Smirnov-Test wiesen der KiSS.2-Gesamtscore (Gesamtpunktzahl), die KiSS.2-Untertestscores und das Alter der Kinder in Monaten keine Normalverteilung auf. Aus diesem Grund wurden nicht-parametrische Testverfahren verwendet.
